# Supplementary material for: Formulation and Optimization of Nanospanlastics for Improving the Bioavailability of Green Tea Epigallocatechin Gallate
Source: PubMed Central journal article supplement (PMC7831059; doi:10.3390/ph14010068), 2021-01-15
Supplement: pharmaceuticals-14-00068-s001.pdf [file pharmaceuticals-14-00068-s001.pdf]

**Table S1.** The prescreening study for the formulation of EGCG-loaded SNVs using different rotation speeds and sonication times.

| Formula | Rotation speed (rpm) | Sonication time (min) | * EE%        |
|---------|----------------------|-----------------------|--------------|
| P1      | 500                  | 3                     | 88.04±2.82   |
| P2      | 500                  | 5                     | 64.11 ± 1.41 |
| P3      | 1000                 | 3                     | 77.32±1.28   |
| P4      | 1000                 | 5                     | 53.44 ± 1.36 |

Notes: \* the values are described as mean ± SD (n = 3). Abbreviations: EE, entrapment efficiency.

**Table S2.** Prescreening study for selecting the most suitable levels of different independent variables required for preparing EGCG-loaded SNVs.

| Formula | Non-ionic surfactant to EA ratio | Type of non-ionic surfactant | Type of EA | *EE%       |
|---------|----------------------------------|------------------------------|------------|------------|
| S1      | 1:1                              | Cremophor RH                 | Brij 35    | 35.28±1.24 |
| S2      | 1:1                              | Cremophor RH                 | Tween 80   | 50.32±1.78 |
| S3      | 1:1                              | Cremophor RH                 | Tween 60   | 61.48±2.11 |
| S4      | 1:1                              | Span 60                      | Brij 35    | 68.34±1.44 |
| S5      | 1:1                              | Span 60                      | Tween 80   | 80.12±1.73 |
| S6      | 1:1                              | Span 60                      | Tween 60   | 88.95±1.92 |
| S7      | 1:1                              | Span 80                      | Brij 35    | 50.21±1.22 |
| S8      | 1:1                              | Span 80                      | Tween 80   | 64.21±1.44 |
| S9      | 1:1                              | Span 80                      | Tween 60   | 71.43±1.28 |
| S10     | 3:2                              | Cremophor RH                 | Brij 35    | 44.60±1.34 |
| S11     | 3:2                              | Cremophor RH                 | Tween 80   | 59.48±1.21 |
| S12     | 3:2                              | Cremophor RH                 | Tween 60   | 67.34±1.95 |
| S13     | 3:2                              | Span 60                      | Brij 35    | 74.59±1.33 |
| S14     | 3:2                              | Span 60                      | Tween 80   | 88.04±2.82 |
| S15     | 3:2                              | Span 60                      | Tween 60   | 92.35±1.34 |
| S16     | 3:2                              | Span 80                      | Brij 35    | 57.11±1.48 |
| S17     | 3:2                              | Span 80                      | Tween 80   | 70.53±1.81 |
| S18     | 3:2                              | Span 80                      | Tween 60   | 80.56±1.57 |
| S19     | 4:1                              | Cremophor RH                 | Brij 35    | 58.29±1.63 |
| S20     | 4:1                              | Cremophor RH                 | Tween 80   | 70.33±1.28 |
| S21     | 4:1                              | Cremophor RH                 | Tween 60   | 80.02±2.14 |
| S22     | 4:1                              | Span 60                      | Brij 35    | 80.35±1.28 |
| S23     | 4:1                              | Span 60                      | Tween 80   | 90.49±1.22 |
| S24     | 4:1                              | Span 60                      | Tween 60   | 97.93±1.28 |
| S25     | 4:1                              | Span 80                      | Brij 35    | 64.23±1.22 |
| S26     | 4:1                              | Span 80                      | Tween 80   | 80.32±1.38 |
| S27     | 4:1                              | Span 80                      | Tween 60   | 89.99±2.16 |

Notes: \* the values are expressed as mean ± SD (n = 3). Abbreviations: EE, entrapment efficiency; EA, edge activator.
